# Supplementary material
Source: HighWire-hosted journal article supplement (https://rmdopen.bmj.com/content/9/1/e002789)
Supplement: inline-supplementary-material-1 [file inline-supplementary-material-1.pdf]

**Supplemental Table 1. Select baseline demographic and disease characteristics for DISCOVER-2 patients.**

|                             | Guselkumab Q4W | Guselkumab Q8W | Placebo     |
|-----------------------------|----------------|----------------|-------------|
| Patients, N                 | 245            | 248            | 246         |
| Age, years                  | 45.9 ± 11.5    | 44.9 ± 11.9    | 46.3 ± 11.7 |
| Female                      | 103 (42)       | 119 (48)       | 129 (52)    |
| PsA disease duration, years | 5.5 ± 5.9      | 5.1 ± 5.5      | 5.8 ± 5.6   |
| Tender joint count (0-68)   | 22.4 ± 13.5    | 19.8 ± 11.9    | 21.6 ± 13.1 |
| Swollen joint count (0-66)  | 12.9 ± 7.8     | 11.7 ± 6.8     | 12.3 ± 6.9  |
| PtGA (arthritis; VAS 0-10)  | 6.4 ± 1.9      | 6.5 ± 1.9      | 6.5 ± 1.8   |
| HAQ-DI (0-3)                | 1.2 ± 0.6      | 1.3 ± 0.6      | 1.3 ± 0.6   |
| PASDAS                      | 6.6 ± 1.1      | 6.6 ± 1.1      | 6.6 ± 0.9   |
| DAPSA                       | 49.7 ± 21.1    | 46.3 ± 19.4    | 48.8 ± 19.4 |
| Patients with enthesitis    | 170 (69)       | 158 (64)       | 178 (72)    |
| Patients with dactylitis    | 121 (49)       | 111 (45)       | 99 (40)     |

Data reported as mean ± (standard deviation) or n (%) unless otherwise noted.

DAPSA, Disease Activity in Psoriatic Arthritis; HAQ-DI, Health Assessment Questionnaire-Disability Index;

PASDAS, Psoriatic Arthritis Disease Activity Score; PtGA, patient's global assessment; Q4W, every 4 weeks;

Q8W, every 8 weeks

**Supplemental Table 2. Observed mean changes in PsA-modified vdH-S scores through Week 52 in DISCOVER-2 patients evaluated in reading session 2\***

|                                           | Guselkumab Q4W |                 | Guselkumab Q8W |                 | Placebo (W0-24) →<br>Guselkumab Q4W<br>(W24-52) |                 |
|-------------------------------------------|----------------|-----------------|----------------|-----------------|-------------------------------------------------|-----------------|
|                                           | W0-24<br>N=232 | W24-52<br>N=229 | W0-24<br>N=238 | W24-52<br>N=235 | W0-24<br>N=231                                  | W24-52<br>N=230 |
| <b>Change in PsA-modified vdH-S score</b> |                |                 |                |                 |                                                 |                 |
| Total                                     | 0.5 (2.5)      | 0.6 (2.5)       | 0.7 (2.5)      | 0.2 (1.8)       | 1.0 (3.2)                                       | 0.2 (1.6)       |
| Erosion                                   | 0.3 (1.9)      | 0.4 (1.7)       | 0.6 (2.0)      | 0.1 (1.4)       | 0.8 (2.3)                                       | 0.2 (1.3)       |
| Joint space narrowing                     | 0.2 (1.0)      | 0.2 (1.1)       | 0.2 (0.8)      | 0.1 (0.7)       | 0.2 (1.1)                                       | 0.1 (0.6)       |

Data presented as mean (standard deviation).

PsA-modified vdH-S score, van der Heijde-Sharp score modified for psoriatic arthritis; Q4W, every 4 weeks; Q8W, every 8 weeks; W, week

\*Reading session 2 included patients continuing study treatment at Week 24 with images at Weeks 0, 24, and 52 (or at discontinuation after Week 24).
